# Supplementary material for: Cation and anion co-partial substitution induced centrosymmetric to noncentrosymmetric structural transformation to construct nonlinear-optical rare-earth oxythiogermanates
Source: Royal Society of Chemistry journal article supplement (doi:10.1039/d4qi01195c), 2024-01-01
Supplement: d4qi01195c1.pdf [file d4qi01195c1.pdf]

Electronic Supplementary Material (ESI) for Inorganic Chemistry Frontiers.  
This journal is © the Partner Organisations 2024

## *Supporting Information*

### **Cation and Anion Co-Partial Substitution Induced Centrosymmetric to Noncentrosymmetric Structural Transformation to Construct Nonlinear-Optical Rare-Earth Oxythiogermanates**

Nan Zhang,<sup>a</sup> Mei Yang,<sup>a</sup> Wen-Dong Yao,<sup>a</sup> Wei Xu,<sup>a</sup> Wenfeng Zhou,<sup>a</sup> Wenlong Liu,<sup>a</sup> and Sheng-Ping Guo<sup>a,b\*</sup>

<sup>a</sup>School of Chemistry & Chemical Engineering, Yangzhou University, Yangzhou, Jiangsu 22500

<sup>b</sup>Yunnan Key Laboratory of Electromagnetic Materials and Devices, National Center for International Research on Photoelectric and Energy Materials, School of Materials and Energy, Yunnan University, Kunming, Yunnan 650091

\*Corresponding author: spguo@yzu.edu.cn; spguo@ynu.edu.cn

## Contents

### 1. Tables

**Table S1.** Crystal data and structure refinement parameters for **1–3**.

**Table S2.** Atomic coordinates ( $\times 10^4$ ) and equivalent isotropic displacement parameters ( $U_{\text{eq}}^{\text{a}}$ ,  $\text{\AA}^2 \times 10^3$ ) for **1–3**.

**Table S3.** Bond distances for **1–3**.

**Table S4.** LIDTs of **1**, **2** and AGS for their powder samples (75–110  $\mu\text{m}$ ).

**Table S5.** Thermal expansion coefficients (TECs,  $\alpha\text{L}$ ) ( $\times 10^{-5} \text{K}^{-1}$ ) of **1**, **2** and the reference AGS along *a*-, *b*- and *c*-axis, and the thermal expansion anisotropy (TEA,  $\delta$ ) of **1**, **2** and AGS.

**Table S6.** NLO properties of **1–3** and other reported rare-earth oxychalcogenides.

**Table S7.** The calculated dipole moments (esu cm  $\text{\AA}^{-3}$ ) in one unit cell of **1** and **2**.

**Table S8.** Distortion degrees of polyhedral units in **1** and **2**.

### 2. Figures

**Figure S1.** The crystals' photographs of **1–3**.

**Figure S2.** The powder XRD patterns of **1–3**.

**Figure S3.** The EDS images for single crystals of **1–3**.

**Figure S4.** Coordination geometry of **0**.

**Figure S5.** Coordination geometries of **1–3**.

**Figure S6.** Photographs of **1–3** for the measurements of birefringence with polarizing microscope.

**Figure S7.** DSC curves of **1** and **2**.

**Figure S8.** The powder XRD patterns of **1** and **2** after calcination.

**Figure S9.** The calculated SHG tensors and birefringences of **1–3**.

**Figure S10.** The calculated dipole moments for one unit cell of **1** and **2**.

### 3. References

## 1. Tables

**Table S1.** Crystal data and structure refinement parameters for 1–3.

| Chemical formula                                                                         | Eu <sub>18</sub> Ge <sub>9</sub> O <sub>5</sub> S <sub>31</sub> (1) | Ca <sub>3.32</sub> Eu <sub>14.68</sub> Ge <sub>9</sub> O <sub>5</sub> S <sub>31</sub> (2) | Ba <sub>3</sub> Eu <sub>15</sub> Ge <sub>9</sub> O <sub>5</sub> S <sub>31</sub> (3) |
|------------------------------------------------------------------------------------------|---------------------------------------------------------------------|-------------------------------------------------------------------------------------------|-------------------------------------------------------------------------------------|
| Formula weight                                                                           | 4462.45                                                             | 4091.01                                                                                   | 4418.59                                                                             |
| Temperature (K)                                                                          |                                                                     | 296                                                                                       |                                                                                     |
| Crystal system                                                                           |                                                                     | trigonal                                                                                  |                                                                                     |
| Space group                                                                              |                                                                     | <i>R</i> 3                                                                                |                                                                                     |
| <i>a</i> (Å)                                                                             | 16.8496(4)                                                          | 16.7573(8)                                                                                | 16.8834(7)                                                                          |
| <i>c</i> (Å)                                                                             | 17.9927(6)                                                          | 17.9107(9)                                                                                | 18.0091(8)                                                                          |
| $\gamma$ /°                                                                              |                                                                     | 120                                                                                       |                                                                                     |
| <i>V</i> (Å <sup>3</sup> )                                                               | 4423.9(3)                                                           | 4355.6(5)                                                                                 | 4445.7(4)                                                                           |
| <i>Z</i>                                                                                 |                                                                     | 3                                                                                         |                                                                                     |
| <i>D</i> <sub>calc</sub> (g/cm <sup>3</sup> )                                            | 5.025                                                               | 4.679                                                                                     | 4.951                                                                               |
| $\mu$ (mm <sup>-1</sup> )                                                                | 24.431                                                              | 21.588                                                                                    | 23.148                                                                              |
| <i>F</i> (000)                                                                           | 5874.0                                                              | 5446.0                                                                                    | 5811.0                                                                              |
| 2 $\theta$ range (°)                                                                     | 4.836 to 56.706                                                     | 4.862 to 61.032                                                                           | 3.588 to 50.036                                                                     |
| Indep. reflns/ <i>R</i> <sub>int</sub>                                                   | 4356/0.0319                                                         | 5845/0.0438                                                                               | 3514/0.0379                                                                         |
| GOF on <i>F</i> <sup>2</sup>                                                             | 0.974                                                               | 1.047                                                                                     | 1.187                                                                               |
| Flack parameter                                                                          | -0.001(9)                                                           | -0.009(8)                                                                                 | 0.09(3)                                                                             |
| <i>R</i> 1 <sup>a</sup> , <i>wR</i> 2 <sup>b</sup> [ <i>I</i> ≥ 2 $\sigma$ ( <i>I</i> )] | 0.0189, 0.0310                                                      | 0.0265, 0.0510                                                                            | 0.0283, 0.0693                                                                      |
| <i>R</i> 1 <sup>a</sup> , <i>wR</i> 2 <sup>b</sup> [all data]                            | 0.0207, 0.0314                                                      | 0.0291, 0.0516                                                                            | 0.0291, 0.0701                                                                      |
| Largest diff. peak/hole/e Å <sup>-3</sup>                                                | 0.84/-0.90                                                          | 0.96/-2.39                                                                                | 2.29/-2.55                                                                          |

$${}^a\text{R1} = \frac{\sum ||F_o| - |F_c||}{\sum |F_o|}; \quad {}^b\text{wR2} = \left\{ \frac{[\sum w(F_o^2 - F_c^2)^2]}{[\sum w(F_o^2)^2]} \right\}^{1/2}.$$

**Table S2.** Atomic coordinates ( $\times 10^4$ ) and equivalent isotropic displacement parameters ( $U_{\text{eq}}^a$ ,  $\text{\AA}^2 \times 10^3$ ) for **1–3**.

| Atom     | Wyck. site | Occupancy | $x$         | $y$         | $z$        | $U_{\text{eq}}$ |
|----------|------------|-----------|-------------|-------------|------------|-----------------|
| <b>1</b> |            |           |             |             |            |                 |
| Eu(1)    | <i>9b</i>  | 1         | 1341.3(3)   | 8239.2(3)   | 6710.7(2)  | 11.68(9)        |
| Eu(2)    | <i>9b</i>  | 1         | 3254.2(3)   | 8055.3(3)   | 8051.4(2)  | 12.18(9)        |
| Eu(3)    | <i>9b</i>  | 1         | 1283.1(3)   | 9902.3(3)   | 4854.7(2)  | 10.29(9)        |
| Eu(4)    | <i>9b</i>  | 1         | -1467.2(3)  | 6728.5(3)   | 6671.2(2)  | 11.32(9)        |
| Eu(5)    | <i>9b</i>  | 1         | 1784.6(3)   | 6679.1(3)   | 5234.8(2)  | 12.00(9)        |
| Eu(6)    | <i>9b</i>  | 1         | 1773.0(3)   | 8325.7(3)   | 9993.8(2)  | 10.91(9)        |
| Ge(1)    | <i>3a</i>  | 1         | 0           | 10000       | 3359.5(7)  | 7.1(3)          |
| Ge(2)    | <i>3a</i>  | 1         | 3333.33     | 6666.67     | 3243.9(7)  | 7.9(3)          |
| Ge(3)    | <i>9b</i>  | 1         | 3263.6(5)   | 9828.1(5)   | 5416.3(4)  | 6.78(17)        |
| Ge(4)    | <i>9b</i>  | 1         | 4.1(5)      | 6540.1(5)   | 7972.5(4)  | 6.17(17)        |
| Ge(5)    | <i>3a</i>  | 1         | 3333.33     | 6666.67     | 6720.4(8)  | 6.9(3)          |
| S(1)     | <i>3a</i>  | 1         | 3333.33     | 6666.67     | 4469.4(17) | 13.4(7)         |
| S(2)     | <i>9b</i>  | 1         | 3312.8(12)  | 7899.5(12)  | 6330.8(10) | 11.2(4)         |
| S(3)     | <i>9b</i>  | 1         | 3167.4(12)  | 9934.1(12)  | 6640.3(9)  | 10.0(4)         |
| S(4)     | <i>9b</i>  | 1         | -1261.0(12) | 5327.1(13)  | 7573.9(10) | 9.1(4)          |
| S(5)     | <i>9b</i>  | 1         | 1993.7(12)  | 8803.8(13)  | 8385.8(10) | 9.5(4)          |
| S(6)     | <i>9b</i>  | 1         | 1253.7(12)  | 6581.7(12)  | 7521.5(10) | 9.9(4)          |
| S(7)     | <i>9b</i>  | 1         | 3295.0(13)  | 11084.1(12) | 5015.5(9)  | 9.6(4)          |
| S(8)     | <i>9b</i>  | 1         | 3414.6(13)  | 7979.9(13)  | 9713.5(11) | 12.5(4)         |

|       |    |   |            |            |            |         |
|-------|----|---|------------|------------|------------|---------|
| S(9)  | 9b | 1 | 2017.3(12) | 8604.1(12) | 5041.7(10) | 10.3(4) |
| S(10) | 9b | 1 | 99.5(13)   | 6786.6(13) | 9183.3(10) | 9.0(4)  |
| S(11) | 9b | 1 | -68.6(13)  | 8757.3(12) | 6102.3(10) | 11.7(4) |
| O(1)  | 3a | 1 | 0          | 10000      | 4354(4)    | 8.7(18) |
| O(2)  | 3a | 1 | 3333.33    | 6666.67    | 7724(4)    | 6.6(17) |
| O(3)  | 9b | 1 | -19(3)     | 7482(3)    | 7535(2)    | 8.3(10) |

**2**

|       |    |       |            |           |           |           |
|-------|----|-------|------------|-----------|-----------|-----------|
| Eu(1) | 9b | 0.848 | 1353.5(3)  | 8243.4(4) | 6712.0(3) | 13.59(15) |
| Eu(2) | 9b | 0.750 | 3261.8(4)  | 8058.7(4) | 8049.9(3) | 12.97(18) |
| Eu(3) | 9b | 0.762 | 1283.4(4)  | 9905.5(4) | 4848.1(3) | 11.18(17) |
| Eu(4) | 9b | 1     | -1466.3(3) | 6734.7(3) | 6668.5(2) | 12.33(12) |
| Eu(5) | 9b | 0.705 | 1787.8(4)  | 6678.4(4) | 5232.8(4) | 13.28(19) |
| Eu(6) | 9b | 0.829 | 1767.3(4)  | 8329.2(4) | 9994.7(3) | 11.76(15) |
| Ca(1) | 9b | 0.152 | 1353.5(3)  | 8243.4(4) | 6712.0(3) | 13.59(15) |
| Ca(2) | 9b | 0.250 | 3261.8(4)  | 8058.7(4) | 8049.9(3) | 12.97(18) |
| Ca(3) | 9b | 0.238 | 1283.4(4)  | 9905.5(4) | 4848.1(3) | 11.18(17) |
| Ca(5) | 9b | 0.295 | 1787.8(4)  | 6678.4(4) | 5232.8(4) | 13.28(19) |
| Ca(6) | 9b | 0.171 | 1767.3(4)  | 8329.2(4) | 9994.7(3) | 11.76(15) |
| Ge(1) | 9b | 1     | 0          | 10000     | 3358.0(8) | 7.4(3)    |
| Ge(2) | 9b | 1     | 3333.33    | 6666.67   | 3250.5(8) | 8.6(3)    |
| Ge(3) | 3a | 1     | 3264.0(6)  | 9832.0(6) | 5419.9(5) | 7.71(19)  |
| Ge(4) | 3a | 1     | 7.6(6)     | 6548.8(6) | 7976.7(5) | 6.60(18)  |
| Ge(5) | 3a | 1     | 3333.33    | 6666.67   | 6723.8(9) | 8.4(3)    |

|          |    |   |             |             |            |         |
|----------|----|---|-------------|-------------|------------|---------|
| S(1)     | 9b | 1 | 3333.33     | 6666.67     | 4475(2)    | 18.1(8) |
| S(2)     | 9b | 1 | 3309.7(15)  | 7903.7(14)  | 6330.3(12) | 13.5(4) |
| S(3)     | 9b | 1 | 3168.8(15)  | 9931.7(14)  | 6649.5(12) | 12.7(4) |
| S(4)     | 9b | 1 | -1258.8(14) | 5330.2(14)  | 7567.7(11) | 8.8(4)  |
| S(5)     | 9b | 1 | 1997.6(14)  | 8795.7(14)  | 8389.8(11) | 10.9(4) |
| S(6)     | 9b | 1 | 1258.7(14)  | 6584.4(14)  | 7523.0(12) | 10.9(4) |
| S(7)     | 9b | 1 | 3288.8(15)  | 11088.4(14) | 5015.8(11) | 11.6(4) |
| S(8)     | 9b | 1 | 3410.1(14)  | 7980.1(14)  | 9706.7(12) | 12.6(4) |
| S(9)     | 9b | 1 | 2007.8(13)  | 8604.1(14)  | 5043.1(12) | 11.3(4) |
| S(10)    | 9b | 1 | 94.6(14)    | 6795.3(14)  | 9191.1(11) | 9.3(4)  |
| S(11)    | 9b | 1 | -59.2(15)   | 8761.2(14)  | 6097.0(12) | 13.6(4) |
| O(1)     | 9b | 1 | 0           | 10000       | 4352(5)    | 8(2)    |
| O(2)     | 3a | 1 | 3333.33     | 6666.67     | 7740(5)    | 10(2)   |
| O(3)     | 3a | 1 | -7(4)       | 7506(4)     | 7536(3)    | 8.5(11) |
| <b>3</b> |    |   |             |             |            |         |
| Ba(1)    | 9b | 1 | 8452.5(7)   | 8443.2(7)   | 5309.7(7)  | 5.5(3)  |
| Eu(1)    | 9b | 1 | 6886.4(8)   | 8237.3(7)   | 3453.6(5)  | 14.3(3) |
| Eu(2)    | 9b | 1 | 4797.7(7)   | 8053.9(7)   | 4798.4(6)  | 13.6(3) |
| Eu(3)    | 9b | 1 | 8196.7(8)   | 6726.6(9)   | 3413.7(6)  | 13.6(3) |
| Eu(4)    | 9b | 1 | 7953.0(7)   | 4714.7(7)   | 4928.6(6)  | 12.0(3) |
| Eu(5)    | 9b | 1 | 9893.0(7)   | 4986.4(8)   | 3406.3(6)  | 13.5(3) |
| Ge(1)    | 3a | 1 | 3333.33     | 6666.67     | 6776.6(19) | 7.0(7)  |
| Ge(2)    | 3a | 1 | 10000       | 10000       | 3329(2)    | 9.1(8)  |

|       |           |   |            |            |            |          |
|-------|-----------|---|------------|------------|------------|----------|
| Ge(3) | <i>9b</i> | 1 | 6541.8(14) | 6547.2(14) | 4721.4(12) | 6.3(4)   |
| Ge(4) | <i>9b</i> | 1 | 9933.0(14) | 6769.5(14) | 5494.1(12) | 9.3(5)   |
| Ge(5) | <i>3a</i> | 1 | 10000      | 10000      | 6804(2)    | 7.0(7)   |
| S(1)  | <i>3a</i> | 1 | 10000      | 10000      | 4542(5)    | 15.7(18) |
| S(2)  | <i>9b</i> | 1 | 6584(3)    | 5330(3)    | 4323(3)    | 10.6(10) |
| S(3)  | <i>9b</i> | 1 | 3419(3)    | 8748(3)    | 4274(3)    | 11.1(10) |
| S(4)  | <i>9b</i> | 1 | 8824(3)    | 8767(4)    | 2845(3)    | 15.8(11) |
| S(5)  | <i>9b</i> | 1 | 9980(3)    | 8748(3)    | 6411(3)    | 11.7(10) |
| S(6)  | <i>9b</i> | 1 | 8683(3)    | 6744(3)    | 5121(3)    | 12.0(10) |
| S(7)  | <i>9b</i> | 1 | 9960(3)    | 5545(3)    | 5088(3)    | 11.4(10) |
| S(8)  | <i>9b</i> | 1 | 4570(3)    | 7968(3)    | 6454(3)    | 13.5(10) |
| S(9)  | <i>9b</i> | 1 | 6807(3)    | 8806(3)    | 5128(3)    | 11.4(10) |
| S(10) | <i>9b</i> | 1 | 6696(3)    | 6790(3)    | 5927(3)    | 9.5(10)  |
| S(11) | <i>9b</i> | 1 | 9843(3)    | 6584(3)    | 6718(3)    | 12.2(10) |
| O(1)  | <i>9b</i> | 1 | 7508(10)   | 7502(9)    | 4272(7)    | 13(3)    |
| O(2)  | <i>3a</i> | 1 | 3333.33    | 6666.67    | 7778(12)   | 7.8(18)  |
| O(3)  | <i>3a</i> | 1 | 10000      | 10000      | 7823(12)   | 9(5)     |

---

<sup>a</sup> $U_{eq}$  is defined as 1/3 of the trace of the orthogonalized  $U_{ij}$  tensor.

**Table S3.** Bond distances for **1–3**.

| <b>Bond</b>              | <b>Distance/Å</b> | <b>Bond</b>               | <b>Distance/Å</b> |
|--------------------------|-------------------|---------------------------|-------------------|
| <b>1</b>                 |                   |                           |                   |
| Eu(1)–S(3)               | 2.9752(18)        | Eu(5)–S(5) <sup>2</sup>   | 3.1358(18)        |
| Eu(1)–S(5)               | 3.1863(18)        | Eu(5)–S(9)                | 3.0860(19)        |
| Eu(1)–S(6)               | 3.0883(19)        | Eu(5)–S(10) <sup>2</sup>  | 3.088(19)         |
| Eu(1)–S(9)               | 3.1611(19)        | Eu(5)–O(3) <sup>2</sup>   | 2.457(5)          |
| Eu(1)–S(10) <sup>2</sup> | 3.0031(19)        | Eu(6)–S(2) <sup>6</sup>   | 3.4314(19)        |
| Eu(1)–S(11)              | 3.1110(19)        | Eu(6)–S(3) <sup>6</sup>   | 2.961(19)         |
| Eu(1)–O(3)               | 2.482(4)          | Eu(6)–S(4) <sup>1</sup>   | 2.8952(18)        |
| Eu(2)–S(2)               | 3.1127(18)        | Eu(6)–S(5)                | 2.9763(18)        |
| Eu(2)–S(5)               | 3.0237(18)        | Eu(6)–S(6) <sup>1</sup>   | 3.0407(18)        |
| Eu(2)–S(6) <sup>3</sup>  | 3.2258(19)        | Eu(6)–S(7) <sup>12</sup>  | 3.1607(17)        |
| Eu(2)–S(6)               | 3.1729(19)        | Eu(6)–S(8)                | 3.1397(19)        |
| Eu(2)–S(7) <sup>6</sup>  | 2.9640(19)        | Eu(6)–S(10)               | 3.0807(19)        |
| Eu(2)–S(8)               | 3.011(2)          | Ge(1)–S(8) <sup>13</sup>  | 2.2200(19)        |
| Eu(2)–O(2)               | 2.4803(18)        | Ge(1)–S(8) <sup>14</sup>  | 2.2200(18)        |
| Eu(3)–S(4) <sup>2</sup>  | 3.1498(18)        | Ge(1)–S(8) <sup>9</sup>   | 2.2199(19)        |
| Eu(3)–S(4) <sup>10</sup> | 3.2744(18)        | Ge(1)–O(1)                | 1.789(7)          |
| Eu(3)–S(7)               | 2.9649(19)        | Ge(2)–S(1)                | 2.205(3)          |
| Eu(3)–S(8) <sup>9</sup>  | 3.254(2)          | Ge(2)–S(11) <sup>2</sup>  | 2.2104(19)        |
| Eu(3)–S(9)               | 3.0223(19)        | Ge(2)–S(11) <sup>15</sup> | 2.2106(19)        |
| Eu(3)–S(11)              | 3.091(19)         | Ge(2)–S(11) <sup>5</sup>  | 2.2105(19)        |
| Eu(3)–S(11) <sup>8</sup> | 3.1276(19)        | Ge(3)–S(3)                | 2.2219(19)        |



|                          |            |                         |            |
|--------------------------|------------|-------------------------|------------|
| Eu(3)–O(1)               | 2.423(3)   | Ge(3)–S(5) <sup>5</sup> | 2.2089(19) |
| Eu(4)–S(3) <sup>7</sup>  | 3.0679(18) | Ge(3)–S(7)              | 2.2112(19) |
| Eu(4)–S(4)               | 3.0256(18) | Ge(3)–S(9)              | 2.1878(19) |
| Eu(4)–S(7) <sup>7</sup>  | 3.2246(17) | Ge(4)–S(4)              | 2.209(2)   |
| Eu(4)–S(8) <sup>11</sup> | 3.328(19)  | Ge(4)–S(6)              | 2.225(2)   |
| Eu(4)–S(9) <sup>1</sup>  | 3.1704(19) | Ge(4)–S(10)             | 2.2086(19) |
| Eu(4)–S(10) <sup>2</sup> | 3.0367(19) | Ge(4)–O(3)              | 1.789(5)   |
| Eu(4)–S(11)              | 3.1986(19) | Ge(5)–S(2) <sup>3</sup> | 2.2090(19) |
| Eu(4)–O(3)               | 2.623(5)   | Ge(5)–S(2)              | 2.2089(19) |
| Eu(5)–S(1)               | 2.9600(15) | Ge(5)–S(2) <sup>4</sup> | 2.2089(19) |
| Eu(5)–S(2) <sup>4</sup>  | 3.1395(19) | Ge(5)–O(2)              | 1.806(8)   |
| Eu(5)–S(2)               | 3.0745(19) |                         |            |

## 2

|                                |          |                                |          |
|--------------------------------|----------|--------------------------------|----------|
| Eu(1)/Ca(1)–S(3)               | 2.943(2) | Eu(5)/Ca(5)–S(5) <sup>1</sup>  | 3.130(2) |
| Eu(1)/Ca(1)–S(5)               | 3.171(2) | Eu(5)/Ca(5)–S(9)               | 3.078(2) |
| Eu(1)/Ca(1)–S(6)               | 3.070(2) | Eu(5)/Ca(5)–S(10) <sup>1</sup> | 3.066(2) |
| Eu(1)/Ca(1)–S(9)               | 3.137(2) | Eu(5)/Ca(5)–O(3) <sup>1</sup>  | 2.425(6) |
| Eu(1)/Ca(1)–S(10) <sup>1</sup> | 2.980(2) | Eu(6)/Ca(6)–S(2) <sup>2</sup>  | 3.398(2) |
| Eu(1)/Ca(1)–S(11)              | 3.102(2) | Eu(6)/Ca(6)–S(3) <sup>2</sup>  | 2.941(2) |
| Eu(1)/Ca(1)–O(3)               | 2.467(5) | Eu(6)/Ca(6)–S(4) <sup>7</sup>  | 2.880(2) |
| Eu(2)/Ca(2)–S(2)               | 3.095(2) | Eu(6)/Ca(6)–S(5)               | 2.953(2) |
| Eu(2)/Ca(2)–S(5)               | 3.000(2) | Eu(6)/Ca(6)–S(6) <sup>7</sup>  | 3.021(2) |
| Eu(2)/Ca(2)–S(6)               | 3.157(2) | Eu(6)/Ca(6)–S(7) <sup>11</sup> | 3.141(2) |
| Eu(2)/Ca(2)–S(6) <sup>3</sup>  | 3.194(2) | Eu(6)/Ca(6)–S(8)               | 3.130(2) |

|                                |            |                           |           |
|--------------------------------|------------|---------------------------|-----------|
| Eu(2)/Ca(2)–S(7) <sup>2</sup>  | 2.953(2)   | Eu(6)/Ca(6)–S(10)         | 3.055(2)  |
| Eu(2)/Ca(2)–S(8)               | 2.986(2)   | Ge(1)–S(8) <sup>5</sup>   | 2.214(2)  |
| Eu(2)/Ca(2)–O(2)               | 2.458(2)   | Ge(1)–S(8) <sup>12</sup>  | 2.214(2)  |
| Eu(3)/Ca(3)–S(4) <sup>1</sup>  | 3.139(2)   | Ge(1)–S(8) <sup>13</sup>  | 2.214(2)  |
| Eu(3)/Ca(3)–S(4) <sup>4</sup>  | 3.256(2)   | Ge(1)–O(1)                | 1.781(9)  |
| Eu(3)/Ca(3)–S(7)               | 2.941(2)   | Ge(2)–S(1)                | 2.194(4)  |
| Eu(3)/Ca(3)–S(8) <sup>5</sup>  | 3.240(2)   | Ge(2)–S(11) <sup>14</sup> | 2.208(2)  |
| Eu(3)/Ca(3)–S(9)               | 3.000(2)   | Ge(2)–S(11) <sup>15</sup> | 2.208(2)  |
| Eu(3)/Ca(3)–S(11)              | 3.070(2)   | Ge(2)–S(11) <sup>1</sup>  | 2.208(2)  |
| Eu(3)/Ca(3)–S(11) <sup>6</sup> | 3.119(2)   | Ge(3)–S(3)                | 2.220(2)  |
| Eu(3)/Ca(3)–O(1)               | 2.404(3)   | Ge(3)–S(5) <sup>14</sup>  | 2.203(2)  |
| Eu(4)–S(3) <sup>8</sup>        | 3.051(2)   | Ge(3)–S(7)                | 2.207(2)  |
| Eu(4)–S(4)                     | 3.012(2)   | Ge(3)–S(9)                | 2.188(2)  |
| Eu(4)–S(7) <sup>8</sup>        | 3.198(2)   | Ge(4)–S(4)                | 2.208(2)  |
| Eu(4)–S(8) <sup>9</sup>        | 3.320(2)   | Ge(4)–S(6)                | 2.221(2)  |
| Eu(4)–S(9) <sup>7</sup>        | 3.160(2)   | Ge(4)–S(10)               | 2.205(2)  |
| Eu(4)–S(10) <sup>1</sup>       | 3.031(2)   | Ge(4)–O(3)                | 1.798(6)  |
| Eu(4)–S(11)                    | 3.183(2)   | Ge(5)–S(2) <sup>10</sup>  | 2.208(2)  |
| Eu(4)–O(3)                     | 2.627(5)   | Ge(5)–S(2) <sup>3</sup>   | 2.208(2)  |
| Eu(5)/Ca(5)–S(1)               | 2.9324(18) | Ge(5)–S(2)                | 2.208(2)  |
| Eu(5)/Ca(5)–S(2)               | 3.057(2)   | Ge(5)–O(2)                | 1.820(10) |
| Eu(5)/Ca(5)–S(2) <sup>10</sup> | 3.127(2)   |                           |           |
|                                |            | <b>3</b>                  |           |
| Ba(1)–S(1)                     | 2.963(4)   | Eu(4)–S(6)                | 3.026(5)  |

|                          |           |                           |           |
|--------------------------|-----------|---------------------------|-----------|
| Ba(1)–S(5) <sup>1</sup>  | 3.145(5)  | Eu(4)–S(7)                | 2.963(5)  |
| Ba(1)–S(5)               | 3.086(5)  | Eu(4)–S(8) <sup>10</sup>  | 3.258(5)  |
| Ba(1)–S(6)               | 3.101(5)  | Eu(4)–O(2) <sup>10</sup>  | 2.419(8)  |
| Ba(1)–S(9)               | 3.147(5)  | Eu(5)–S(2) <sup>12</sup>  | 2.894(5)  |
| Ba(1)–S(10)              | 3.089(5)  | Eu(5)–S(3) <sup>2</sup>   | 3.035(5)  |
| Ba(1)–O(1)               | 2.455(14) | Eu(5)–S(5) <sup>9</sup>   | 3.433(5)  |
| Eu(1)–S(3) <sup>6</sup>  | 3.093(5)  | Eu(5)–S(7)                | 3.157(5)  |
| Eu(1)–S(4)               | 3.127(5)  | Eu(5)–S(8) <sup>10</sup>  | 3.148(5)  |
| Eu(1)–S(6) <sup>5</sup>  | 3.154(5)  | Eu(5)–S(9) <sup>10</sup>  | 2.988(5)  |
| Eu(1)–S(9)               | 3.188(5)  | Eu(5)–S(10) <sup>10</sup> | 3.076(5)  |
| Eu(1)–S(10) <sup>5</sup> | 3.000(5)  | Eu(5)–S(11) <sup>9</sup>  | 2.962(5)  |
| Eu(1)–S(11) <sup>5</sup> | 2.975(5)  | Ge(1)–S(8) <sup>7</sup>   | 2.222(5)  |
| Eu(1)–O(1)               | 2.473(13) | Ge(1)–S(8) <sup>6</sup>   | 2.222(5)  |
| Eu(2)–S(3)               | 3.226(5)  | Ge(1)–S(8)                | 2.222(5)  |
| Eu(2)–S(3) <sup>6</sup>  | 3.179(5)  | Ge(1)–O(2)                | 1.80(2)   |
| Eu(2)–S(5) <sup>5</sup>  | 3.116(5)  | Ge(2)–S(1)                | 2.184(9)  |
| Eu(2)–S(7) <sup>1</sup>  | 2.971(5)  | Ge(2)–S(4) <sup>1</sup>   | 2.213(5)  |
| Eu(2)–S(8)               | 3.001(5)  | Ge(2)–S(4)                | 2.213(5)  |
| Eu(2)–S(9)               | 3.028(5)  | Ge(2)–S(4) <sup>2</sup>   | 2.213(5)  |
| Eu(2)–O(3) <sup>8</sup>  | 2.473(5)  | Ge(3)–S(2)                | 2.212(5)  |
| Eu(3)–S(2)               | 3.039(5)  | Ge(3)–S(3) <sup>6</sup>   | 2.229(5)  |
| Eu(3)–S(4)               | 3.224(5)  | Ge(3)–S(10)               | 2.202(5)  |
| Eu(3)–S(6)               | 3.179(5)  | Ge(3)–O(1)                | 1.813(14) |
| Eu(3)–S(7) <sup>9</sup>  | 3.234(5)  | Ge(4)–S(6)                | 2.194(5)  |

|                          |           |                         |          |
|--------------------------|-----------|-------------------------|----------|
| Eu(3)–S(8) <sup>10</sup> | 3.353(5)  | Ge(4)–S(7)              | 2.215(5) |
| Eu(3)–S(10) <sup>5</sup> | 3.052(5)  | Ge(4)–S(9) <sup>2</sup> | 2.205(5) |
| Eu(3)–S(11) <sup>9</sup> | 3.092(5)  | Ge(4)–S(11)             | 2.220(5) |
| Eu(3)–O(1)               | 2.641(13) | Ge(5)–S(5) <sup>2</sup> | 2.214(5) |
| Eu(4)–S(2) <sup>12</sup> | 3.274(5)  | Ge(5)–S(5) <sup>1</sup> | 2.214(5) |
| Eu(4)–S(2)               | 3.163(5)  | Ge(5)–S(5)              | 2.214(5) |
| Eu(4)–S(4) <sup>13</sup> | 3.142(5)  | Ge(5)–O(3)              | 1.830(2) |
| Eu(4)–S(4) <sup>3</sup>  | 3.089(5)  |                         |          |

---

Symmetry transformation used to generate equivalent atoms: **1:** <sup>1</sup>2/3-y, 4/3+x-y, 1/3+z; <sup>2</sup>-2/3+y-x, 2/3-x, -1/3+z; <sup>3</sup>+y-x, 1-x, +z; <sup>4</sup>1-y, 1+x-y, +z; <sup>5</sup>4/3-y, 5/3+x-y, -1/3+z; <sup>6</sup>-1/3+y-x, 4/3-x, 1/3+z; <sup>7</sup>-1+y-x, 1-x,+z; <sup>8</sup>1-y, 2+x-y, +z; <sup>9</sup>-1/3+y-x, 4/3-x, -2/3+z; <sup>10</sup>1/3+x, 2/3+y, -1/3+z; <sup>11</sup>-2/3+x, -1/3+y, -1/3+z; <sup>12</sup>4/3-y, 5/3+x-y, 2/3+z; <sup>13</sup>2/3-y, 4/3+x-y, -2/3+z; <sup>14</sup>-1/3+x, 1/3+y, -2/3+z; <sup>15</sup>1/3+x, -1/3+y, -1/3+z. **2:** <sup>1</sup>-2/3+y-x, 2/3-x, -1/3+z; <sup>2</sup>-1/3+y-x, 4/3-x, 1/3+z; <sup>3</sup>+y-x, 1-x, +z; <sup>4</sup>1/3+x, 2/3+y, -1/3+z; <sup>5</sup>-1/3+y-x, 4/3-x, -2/3+z; <sup>6</sup>1-y, 2+x-y, +z; <sup>7</sup>2/3-y, 4/3+x-y, 1/3+z; <sup>8</sup>-1+y-x, 1-x, +z; <sup>9</sup>-2/3+x, -1/3+y, -1/3+z; <sup>10</sup>1-y, 1+x-y, +z; <sup>11</sup>4/3-y, 5/3+x-y, 2/3+z; <sup>12</sup>-1/3+x, 1/3+y, -2/3+z; <sup>13</sup>2/3-y, 4/3+x-y, -2/3+z; <sup>14</sup>4/3-y, 5/3+x-y, -1/3+z; <sup>15</sup>1/3+x, -1/3+y, -1/3+z. **3:** <sup>1</sup>1+y-x, 2-x, +z; <sup>2</sup>2-y, 1+x-y, +z; <sup>3</sup>2/3+y-x, 4/3-x, 1/3+z; <sup>4</sup>-1/3+x, 1/3+y, 1/3+z; <sup>5</sup>4/3-y, 2/3+x-y, -1/3+z; <sup>6</sup>+y-x, 1-x, +z; <sup>7</sup>1-y, 1+x-y, +z; <sup>8</sup>-2/3+x, -1/3+y, -1/3+z; <sup>9</sup>4/3+y-x, 5/3-x, -1/3+z; <sup>10</sup>1/3+x, -1/3+y, -1/3+z; <sup>11</sup>1-y, +x-y, +z; <sup>12</sup>1+y-x, 1-x, +z; <sup>13</sup>5/3-y, 1/3+x-y, 1/3+z.

**Table S4.** LIDTs of **1**, **2** and AGS for their powder samples (75–110  $\mu\text{m}$ ).

| Compound | Damage energy (mJ) | Spot area ( $\text{cm}^2$ ) | Damage threshold ( $\text{MW}/\text{cm}^2$ ) | Relative value |
|----------|--------------------|-----------------------------|----------------------------------------------|----------------|
| <b>1</b> | 2.3                | 0.02                        | 11.44                                        | 3.3            |
| <b>2</b> | 2.3                | 0.02                        | 11.44                                        | 3.3            |
| AGS      | 0.6                | 0.02                        | 3.48                                         | 1              |

**Table S5.** Thermal expansion coefficients (TECs,  $\alpha_L$ ) ( $\times 10^{-5} \text{K}^{-1}$ ) of **1**, **2** and the reference AGS along *a*-, *b*- and *c*-axis, and the thermal expansion anisotropy (TEA,  $\delta$ ) of **1**, **2** and AGS.

| Compound | <i>a</i> [ $10^{-5} \text{K}^{-1}$ ] | <i>b</i> [ $10^{-5} \text{K}^{-1}$ ] | <i>c</i> [ $10^{-5} \text{K}^{-1}$ ] | $\delta$ |
|----------|--------------------------------------|--------------------------------------|--------------------------------------|----------|
| <b>1</b> | -1.58                                | -1.58                                | -4.08                                | 2.58     |
| <b>2</b> | 1.49                                 | 1.49                                 | 0.77                                 | 1.94     |
| AGS      | 3.08                                 | 3.08                                 | -9.158                               | 2.97     |

**Table S6.** NLO properties of 1–3 and other reported rare-earth oxychalcogenides.

| Compound                                                                                          | Space group                      | $E_g$ (eV) | SHG ( $\times$ AGS) | LIDT ( $\times$ AGS) | $\Delta n$ | PM/NPM | Reference |
|---------------------------------------------------------------------------------------------------|----------------------------------|------------|---------------------|----------------------|------------|--------|-----------|
| Sm <sub>3</sub> NbO <sub>4</sub> S <sub>3</sub>                                                   | <i>Pna2</i> <sub>1</sub>         | 2.68       | 0.3                 | 12.5                 | -          | PM     | 1         |
| Gd <sub>3</sub> NbO <sub>4</sub> S <sub>3</sub>                                                   | <i>Pna2</i> <sub>1</sub>         | 2.74       | 0.4                 | 4.5                  | -          | PM     | 1         |
| La <sub>3</sub> Ga <sub>3</sub> Ge <sub>2</sub> O <sub>10</sub> S <sub>3</sub>                    | $\bar{P}6$ <sub>2</sub> <i>c</i> | 4.7        | 2 KDP               | -                    | 0.11       | PM     | 2         |
| LaCaGa <sub>3</sub> OS <sub>6</sub>                                                               | $\bar{P}4$ <sub>2</sub> <i>m</i> | 3.27       | 0.9                 | 14.0                 | 0.163      | PM     | 3         |
| LaSrGa <sub>3</sub> OS <sub>6</sub>                                                               | $\bar{P}4$ <sub>2</sub> <i>m</i> | 3.21       | 1.0                 | 14.0                 | 0.138      | PM     | 3         |
| Eu <sub>3</sub> GeOS <sub>4</sub>                                                                 | <i>Pca2</i> <sub>1</sub>         | 2.05       | 0.24                | 8.86                 | 0.019      | NPM    | 4         |
| Nd <sub>3</sub> [Ga <sub>3</sub> O <sub>3</sub> S <sub>3</sub> ][Ge <sub>2</sub> O <sub>7</sub> ] | $\bar{P}6$ <sub>2</sub> <i>c</i> | 4.35       | 0.8                 | 23.0                 | 0.091      | PM     | 5         |
| Eu <sub>2</sub> MnGe <sub>2</sub> OS <sub>6</sub>                                                 | $\bar{P}4$ <sub>2</sub> <i>m</i> | 2.40       | 0.3                 | 8.3                  | 0.13       | PM     | 6         |
| Eu <sub>2</sub> FeGe <sub>2</sub> OS <sub>6</sub>                                                 | $\bar{P}4$ <sub>2</sub> <i>m</i> | 2.11       | 0.3                 | 2.8                  | 0.12       | PM     | 6         |
| Eu <sub>2</sub> CoGe <sub>2</sub> OS <sub>6</sub>                                                 | $\bar{P}4$ <sub>2</sub> <i>m</i> | 2.14       | 0.5                 | 3.2                  | 0.17       | PM     | 6         |
| Eu <sub>18</sub> Ge <sub>9</sub> O <sub>5</sub> S <sub>31</sub>                                   | <i>R3</i>                        | 2.18       | 0.5                 | 3.3                  | 0.0749     | PM     | this work |
| Ca <sub>3.32</sub> Eu <sub>14.68</sub> Ge <sub>9</sub> O <sub>5</sub> S <sub>31</sub>             | <i>R3</i>                        | 2.23       | 0.6                 | 3.3                  | 0.0543     | PM     | this work |
| Ba <sub>3</sub> Eu <sub>15</sub> Ge <sub>9</sub> O <sub>5</sub> S <sub>31</sub>                   | <i>R3</i>                        | 2.24       | -                   | -                    | 0.0282     | -      | this work |

“-” indicates no available data.

PM: phase-matchable; NPM: non-phase-matchable.

**Table S7.** The calculated dipole moments (esu cm Å<sup>-3</sup>) in one unit cell of **1** and **2**.

| Structural unit                            | GeS <sub>4</sub> | GeOS <sub>3</sub> | Total |
|--------------------------------------------|------------------|-------------------|-------|
| <b>1</b>                                   |                  |                   |       |
| Dipole moment<br>(esu cm Å <sup>-3</sup> ) | 0.085            | 0.116             | 0.201 |
| <b>2</b>                                   |                  |                   |       |
| Dipole moment<br>(esu cm Å <sup>-3</sup> ) | 0.096            | 0.120             | 0.216 |

**Table S8.** Distortion degrees of polyhedral units in **1** and **2**.

| Unite                | DI (M-S/O) | DI (S-M-S/O) | DI (S-S/O) |
|----------------------|------------|--------------|------------|
| <b>1</b>             |            |              |            |
| Ge(1)OS <sub>3</sub> | 0.076503   | 0.04179      | 0.96841    |
| Ge(2)S <sub>4</sub>  | 0.000917   | 0.03069      | 0.96704    |
| Ge(3)S <sub>4</sub>  | 0.004062   | 0.02791      | 0.96708    |
| Ge(4)OS <sub>3</sub> | 0.072664   | 0.03683      | 0.96841    |
| Ge(5)OS <sub>3</sub> | 0.071673   | 0.00882      | 0.9696     |
| <b>2</b>             |            |              |            |
| Ge(1)OS <sub>3</sub> | 0.07711    | 0.03986      | 0.9685     |
| Ge(2)S <sub>4</sub>  | 0.002381   | 0.03582      | 0.96713    |
| Ge(3)S <sub>4</sub>  | 0.004083   | 0.02714      | 0.96712    |
| Ge(4)OS <sub>3</sub> | 0.073529   | 0.03711      | 0.96848    |
| Ge(5)OS <sub>3</sub> | 0.068925   | 0.00777      | 0.96846    |

Distortion degree: the average deviation of bond lengths, bond angles and side lengths from their means.

## 2. Figures

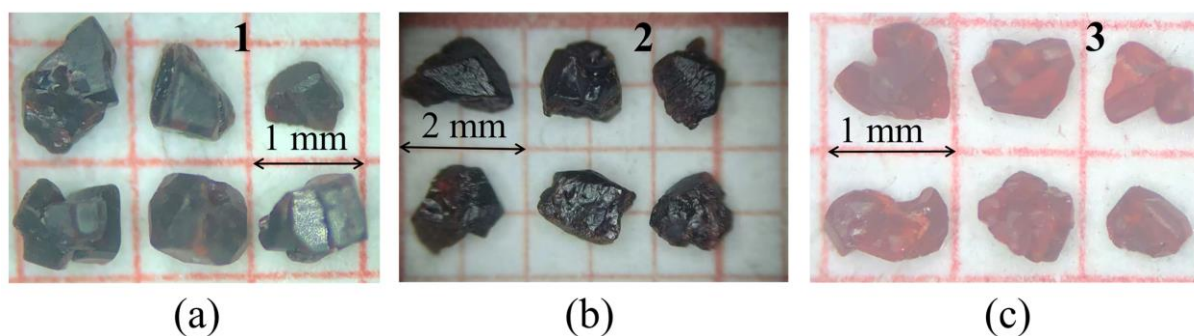

Figure S1. The crystals' photographs of **1** (a), **2** (b) and **3** (c).

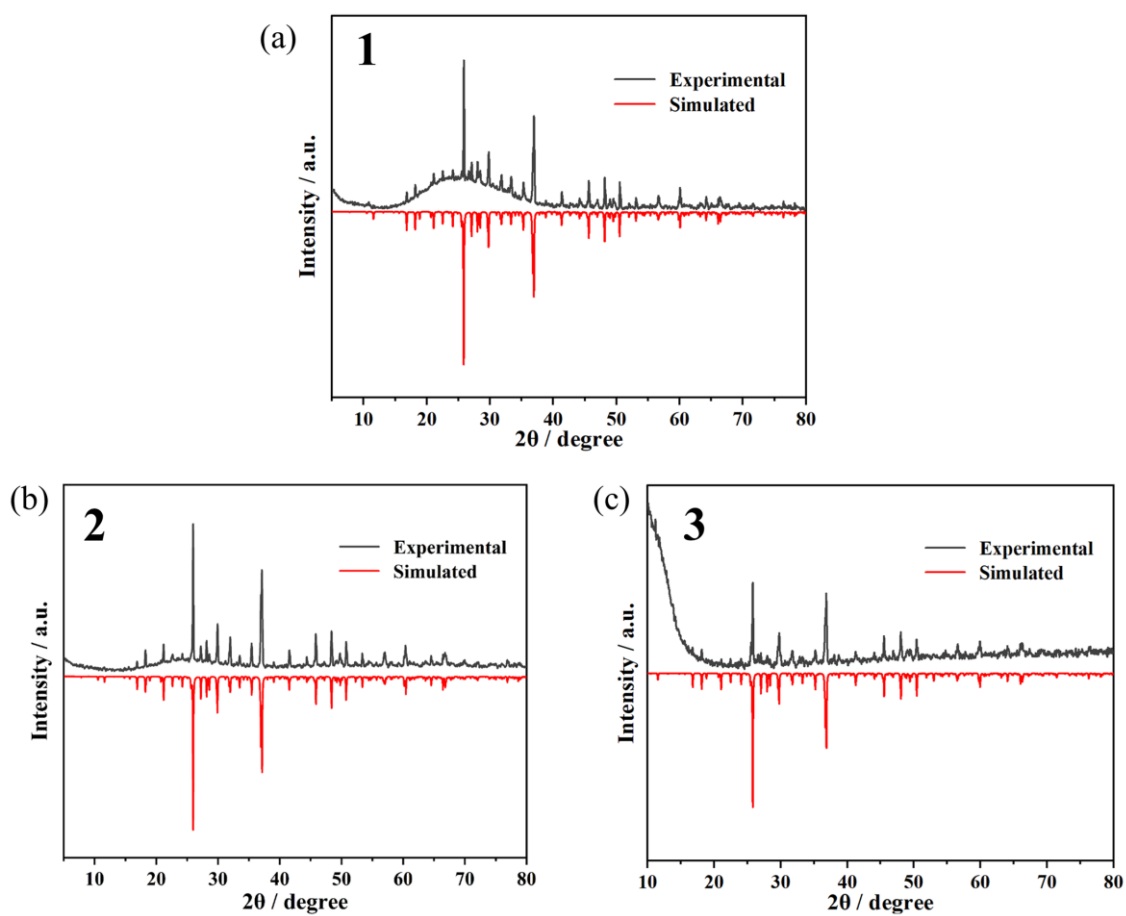

Figure S2. The powder XRD patterns of **1** (a), **2** (b) and **3** (c).



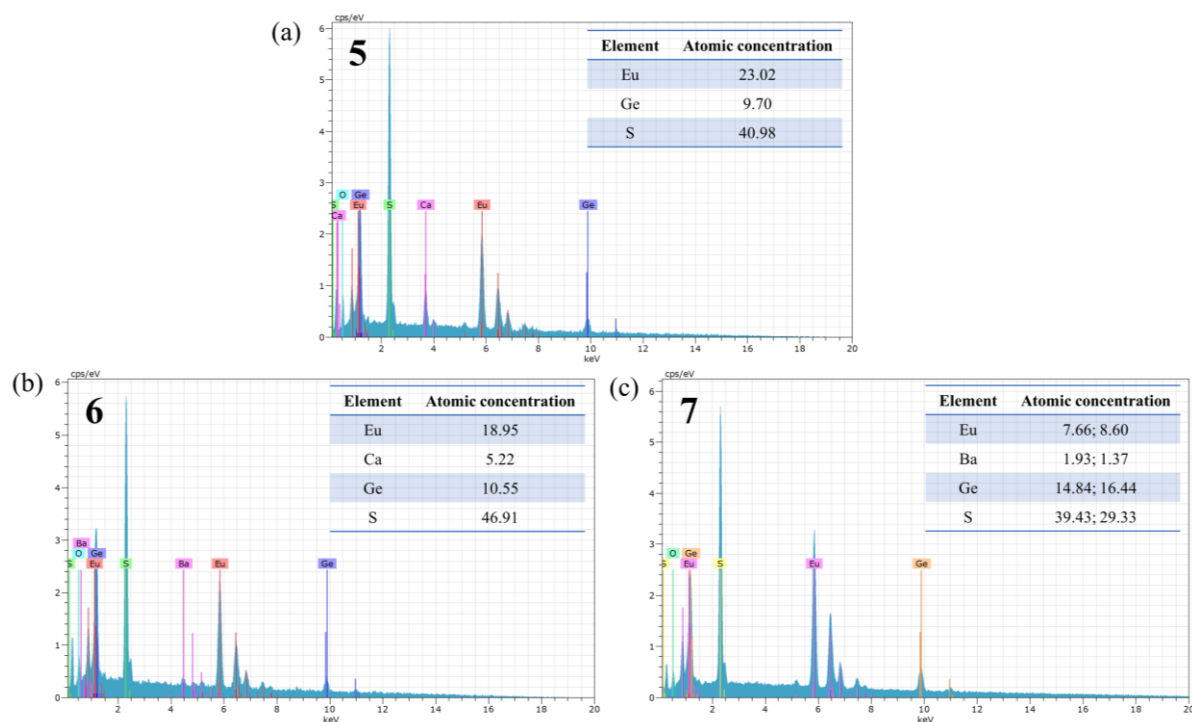

Figure S3. The EDS images for single crystals of 1 (a), 2 (b) and 3 (c).

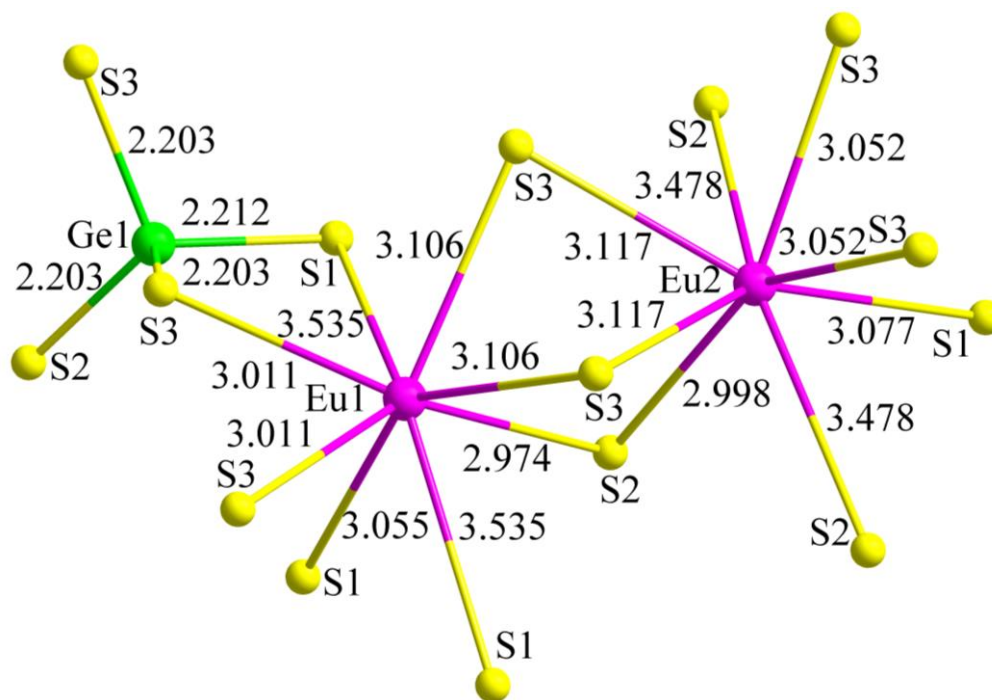

Figure S4. Coordination geometry of 0.

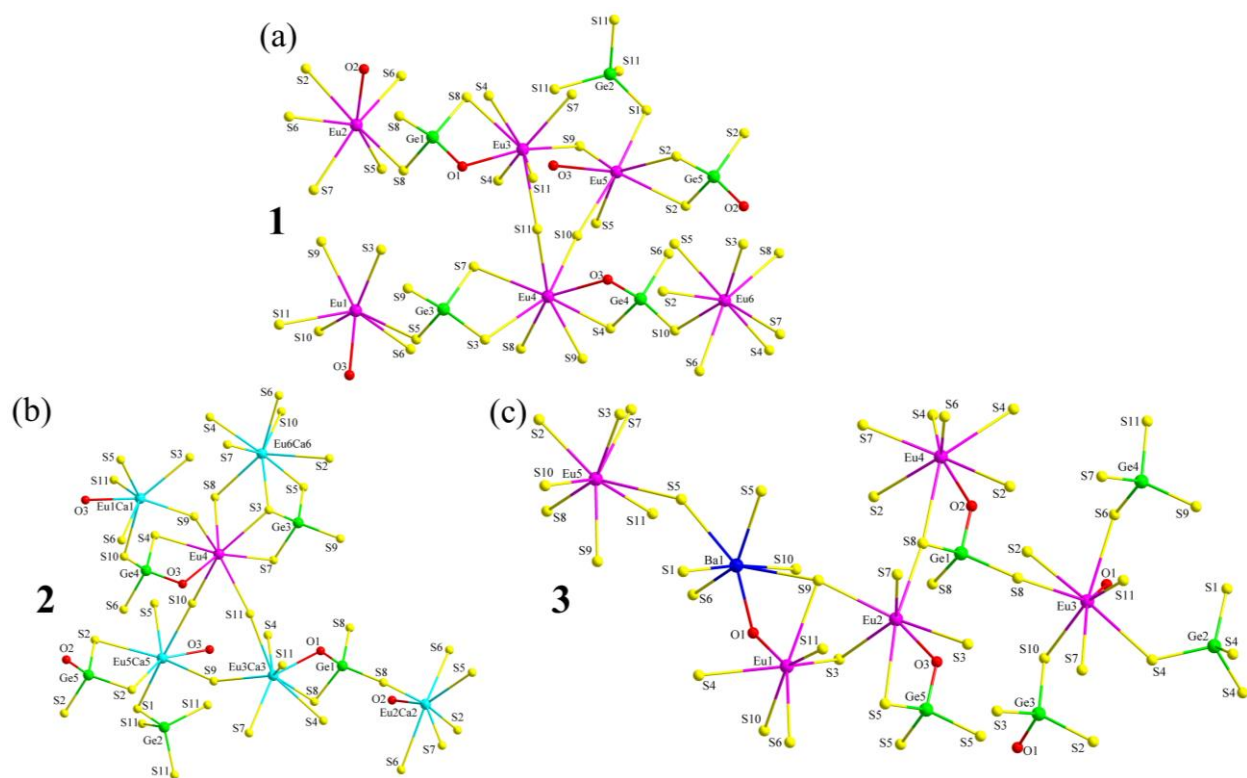

**Figure S5.** Coordination geometries of **1** (a), **2** (b) and **3** (c).

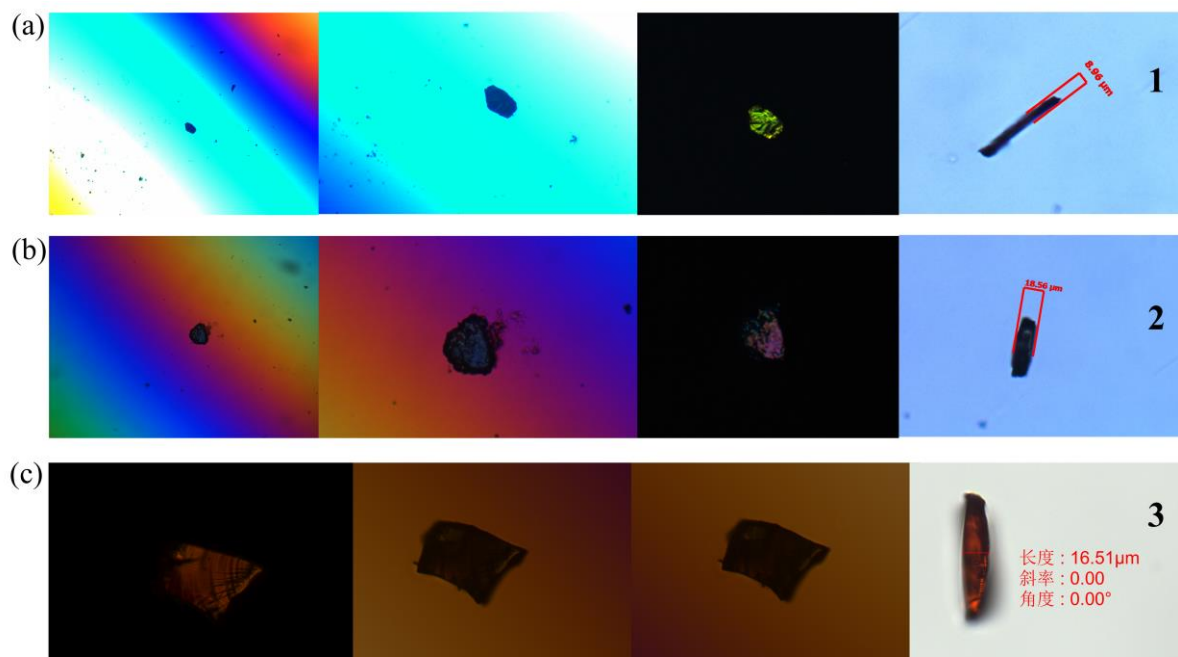

**Figure S6.** Photographs of **1** (a), **2** (b) and **3** (c) for the measurements of birefringence with polarizing microscope.

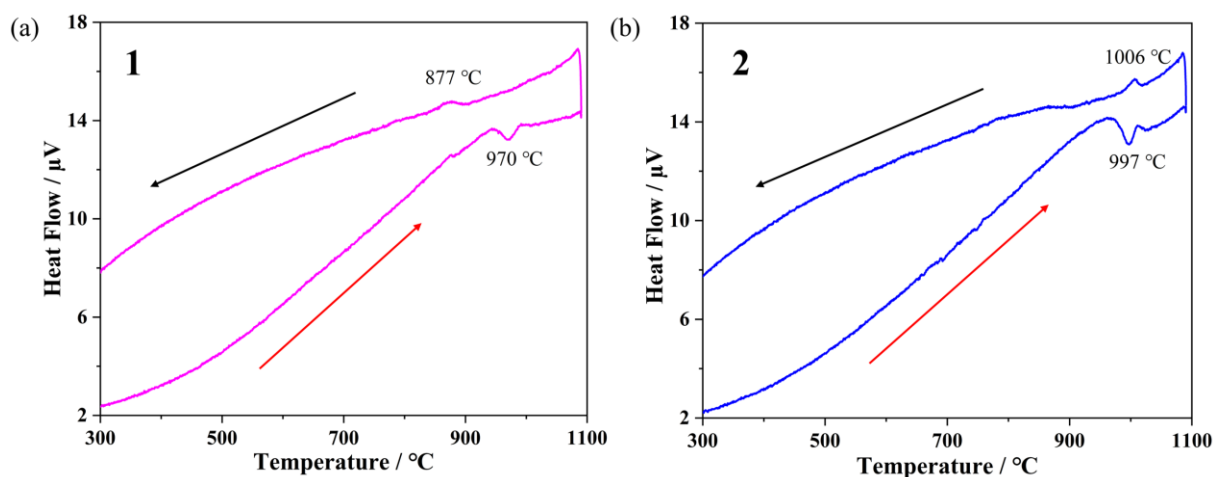

**Figure S7.** DSC curves of **1** and **2**. The red and black arrows represent the heating and cooling processes, respectively.

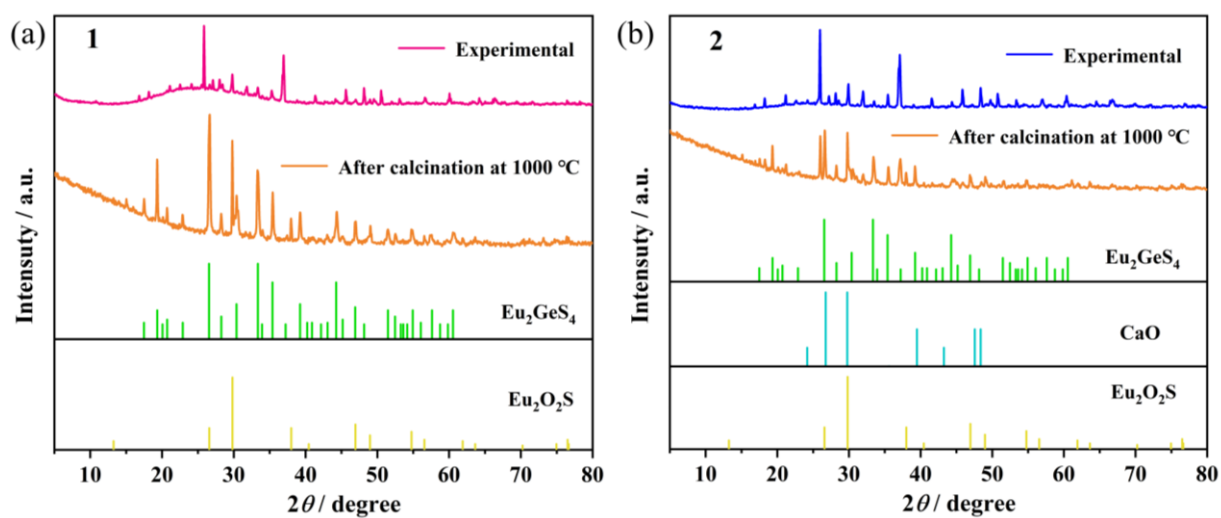

**Figure S8.** The powder XRD patterns of **1** and **2** after calcination.

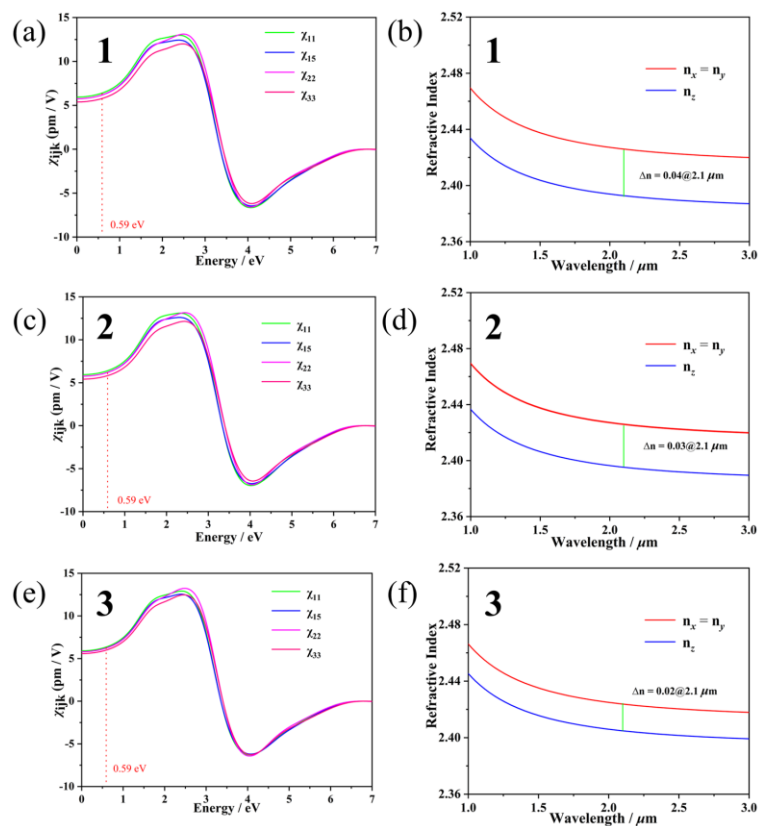

**Figure S9.** The calculated SHG tensors (a, c, e) and birefringences (b, d, f) of 1–3.

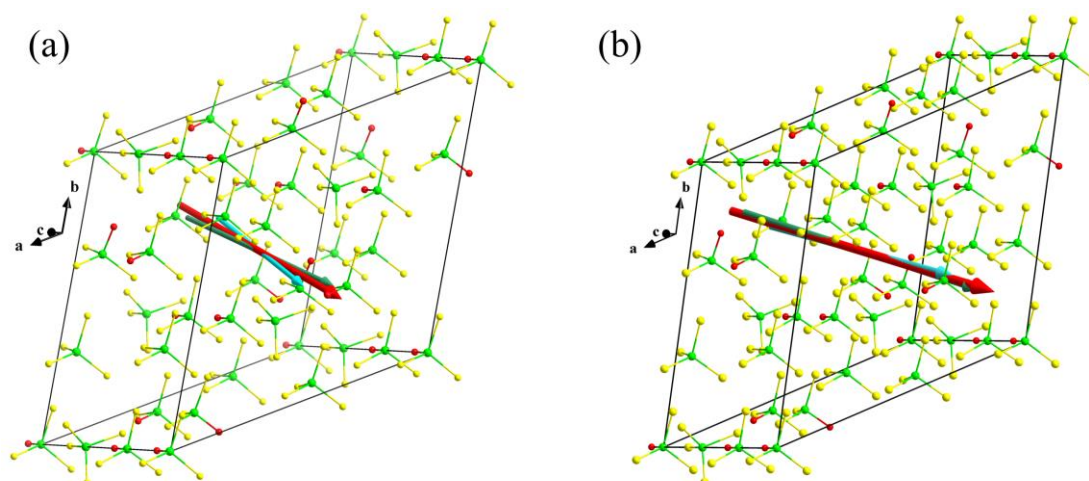

**Figure S10.** The calculated dipole moments for one unit cell of 1 (a) and 2 (b) (Red: total; blue: GeS<sub>4</sub> tetrahedra; green: GeOS<sub>3</sub> tetrahedra).

### 3. References

1. X. Lian, Z.-T. Lu, W.-D. Yao, S.-H. Yang, W. L. Liu, R.-L. Tang, S.-P. Guo, Structural Transformation and Second-Harmonic-Generation Activity in Rare-Earth and  $d^0$  Transition-Metal Oxysulfides  $RE_3NbS_3O_4$  ( $RE = Ce, Sm, Gd, Dy$ ), *Inorg. Chem.* 2021, **60**, 10885–10889.
2. H. Yan, Y. Matsushita, K. Yamaura, Y. Tsujimoto,  $La_3Ga_3Ge_2S_3O_{10}$ : An Ultraviolet Nonlinear Optical Oxysulfide Designed by Anion-Directed Band Gap Engineering, *Angew. Chem. Int. Ed.* 2021, **60**, 26561–26565.
3. J. J. Xu, K. Wu, Y. Xiao, B. B. Zhang, H. H. Yu, H. J. Zhang, Mixed-Anion-Oriented Design of  $LnMGe_3S_6O$  ( $Ln = La, Pr, \text{ and } Nd; M = Ca \text{ and } Sr$ ) Nonlinear Optical Oxysulfides with Targeted Property Balance, *ACS Appl. Mater. Interfaces.* 2022, **14**, 37967–37974.
4. M. Yang, W. D. Yao, W. L. Liu, S. P. Guo, The first quaternary rare-earth oxythiogermanate with second-harmonic generation and ferromagnetic behavior, *Chem. Commun.* 2023, **59**, 3894–3897.
5. M. Y. Ran, S. H. Zhou, W. B. Wei, B. X. Li, X. T. Wu, H. Lin, Q. Li. Zhu, Rational Design of a Rare-Earth Oxychalcogenide  $Nd_3[Ga_3O_3S_3][Ge_2O_7]$  with Superior Infrared Nonlinear Optical Performance, *Small.* 2023, **19**, 2300248.
6. N. Zhang, X. Huang, W. D. Yao, Y. Chen, Z. R. Pan, B. X. Li, W. L. Liu, S. P. Guo,  $Eu_2MGe_2OS_6$  ( $M = Mn, Fe, Co$ ): Three Melilite-Type Rare-Earth Oxythiogermanates Exhibiting Balanced Nonlinear-Optical Behaviors, *Inorg. Chem.* 2023, **62**, 16299–16303.
